# Supplementary material for: Cerebral small vessel disease genomics and its implications across the lifespan
Source: PubMed Central journal article supplement (PMC7722866; doi:10.1038/s41467-020-19111-2), 2020-12-08
Supplement: 41467_2020_19111_MOESM3_ESM.pdf [file 41467_2020_19111_MOESM3_ESM.pdf]

## Descriptions of Additional Supplementary Files

### **Supplementary Data 1.** Study design and sample characteristics of the individual studies

**Description:** MRI = Magnetic Resonance Imaging; WMH = White Matter Hyperintensities; BP = Blood pressure; PP = Pulse Pressure; PC = Principal Component; ICV = Intracranial Volume; 3C-Dijon = Three-City Dijon Study; AGES = AGES-Reykjavik Study; ARIC = Atherosclerosis Risk In Communities Study; AA = African American; EUR = European Ancestry; ASPS = Austrian Stroke Prevention Study; ASPS-Fam = Austrian Stroke Prevention Family Study; CARDIA = Coronary Artery Risk Development in Young Adults; CHAP = Chicago Health and Aging Project; CHS = Cardiovascular Health Study; FHS = Framingham Heart Study; GeneSTAR = Genetic Studies of Atherosclerosis Risk; GENOA = Genetic Epidemiology Network of Arteriopathy; LBC1936 = Lothian Birth Cohort 1936; LLS = Leiden Longevity Study; OATS = Older Australian Twins Study; PROSPER = The Prospective Study on Pravastatin in the Elderly at Risk; RS = Rotterdam Study; SHIP/SHIP-TREND = Study of Health in Pomerania; Sydney MAS = Sydney Memory and Ageing Study; TASCOG = Tasmanian Study of Cognition and Gait; UKBB = UK BioBank. \* Pathologies that may influence WMH measurement. † Grade (0-9 scale). ‡ with information on hypertension status. § Stroke or dementia

### **Supplementary Data 2.** GWAS genotyping platforms, imputation panels and quality control of genotypes

**Description:** SNP = Single Nucleotide Polymorphism; PC = Principal Component; TIV = Total Intracranial volume; ICV = Intracranial Volume; 3C-Dijon = Three-City Dijon Study; AGES = AGES-Reykjavik Study; ARIC = Atherosclerosis Risk In Communities Study; ASPS = Austrian Stroke Prevention Study; ASPS-Fam: Austrian Stroke Prevention Family Study; CARDIA = Coronary Artery Risk Development in Young Adults; CHAP = Chicago Health and Aging Project; CHS = Cardiovascular Health Study; FHS = Framingham Heart Study; GeneSTAR = Genetic Studies of Atherosclerosis Risk; GENOA = Genetic Epidemiology Network of Arteriopathy; LBC1936 = Lothian Birth Cohort 1936; LLS = Leiden Longevity Study; OATS = Older Australian Twins Study; PROSPER = The Prospective Study on Pravastatin in the Elderly at Risk; RS = Rotterdam Study; SHIP/SHIP-TREND = Study of Health in Pomerania; Sydney MAS = Sydney Memory and Ageing Study; TASCOG = Tasmanian Study of Cognition and Gait; UKBB = UK BioBank. \*Affymetrix SNP 6.0. † Illumina Omni 2.5

### **Supplementary Data 3.** Genomic-control inflation factor (AS, lambda) for individual studies and meta-analysis

**Description:** HTN = Hypertension; JMA = Joint Meta-Analysis; EUR = European Ancestry; AA = African-American. \* Main effects are assessed in Model 1 adjusted for age, sex, principal components for population stratification, total intracranial volume, and in Model 2 (Model 1 + hypertension)

### **Supplementary Data 4.** Cross-ancestry comparison of GW associated White Matter Hyperintensities loci

**Description:** GW= Genome-Wide; Meta-Analysis EUR = Meta-Analysis in European Ancestry; Meta-Analysis AA = Meta-Analysis in African-American;

SNP = Single Nucleotide Polymorphism; EA = effect allele; OA = Other Allele;  $\beta$  = effect estimate; SE = Standard Error; P = P-value; HTN = Hypertension.\* Main effects are assessed in Model 1 adjusted for age, sex, principal components for population stratification, total intracranial volume, and in Model 2 (Model 1 + hypertension) . † Additional locus reaching GW significance in the GCTA-COJO analysis for the main effects model,  $\beta_j$ =joint effect, SE\_  $\beta_j$ =Standard error of  $\beta_j$ ,  $P_j$ =Joint P-value. ‡ Additional locus reaching GW significance in the African-American only meta-analysis. § Additional locus reaching GW significance in the MR-MEGA multiancestry meta-analysis

**Supplementary Data 5.** Loci reaching GW significance in the multiancestry meta-analysis for the main effects in association models adjusted for hypertension status or not

**Description:** GW= Genome-Wide; HTN= Hypertension; SNP = Single Nucleotide Polymorphism; EA = Effect Allele; OA = Other Allele; EAF = Effect Allele Frequency;  $\beta$  = effect estimate; SE = Standard Error; P = P-value; P.MRMega = P-value MR-MEGA analysis; PHet-ANC = heterogeneity P-value due to ancestry; PHet-RES = residual

heterogeneity P-value. \* Main effects are assessed in Model 1 adjusted for age, sex, principal components for population stratification, total intracranial volume, and in Model 2 (Model 1 + hypertension). ‡ Additional locus reaching GW significance in the MR-MEGA multiancestry meta-analysis

**Supplementary Data 6.** Loci reaching GW significance in the multiancestry meta-analysis for the joint meta-analysis (JMA) model

**Description:** GW = Genome-Wide; JMA = Joint Meta-Analysis; HTN= Hypertension; Chr = chromosome; SNP = Single Nucleotide Polymorphism; EA = Effect Allele; OA = Other Allele; EAF = Effect Allele Frequency;  $\beta$  = effect estimate; SE = Standard Error; P = P-value. \* Main effects are assessed in Model 1 adjusted for age, sex, principal components for population stratification, total intracranial volume, and in Model 2 (Model 1 + hypertension)

**Supplementary Data 7.** Loci reaching GW significance for the joint meta-analysis (JMA) in African-American specific analysis

**Description:** GW = Genome-Wide; JMA = joint meta-analysis; EUR = European ancestry; AA = African-American; SNP = Single Nucleotide Polymorphism; EA = Effect Allele; OA = Other Allele; EAF = Effect Allele Frequency; P = P-value

**Supplementary Data 8.** Association status of GW associated White Matter Hyperintensity (WMH) loci with WMH burden stratified by hypertension status

**Description:** GW = Genome-Wide; HTN = Hypertension; SNP = Single Nucleotide Polymorphism; EA = Effect Allele; OA = Other Allele; EAF = Effect Allele Frequency;  $\beta$  = effect estimate; SE = Standard Error; P = P-value; Phet = heterogeneity P-value; ncRNA = non coding RNA. \* Additional locus reaching GW significance in the GCTA-COJO analysis for the main effects model. † Locus reaching Genome-Wide significance in African-American specific analysis

**Supplementary Data 9.** Association of GW significant WMH SNPs and WMH wGRS with WMH values in the UK biobank stratified by SBP GRS distribution (quartiles)

**Description:** GW= Genome-wide; Chr = chromosome; SNP = Single Nucleotide Polymorphism; EA = Effect Allele; OA = Other Allele; EAF = Effect Allele Frequency;  $\beta$  = effect estimate; SE = Standard Error; P = P-value; GRS = genetic risk score; wGRS= weighted GRS. Linear regression: adjusted for age, sex, principal components for population stratification, total intracranial volume

**Supplementary Data 10.** Association of GW significant WMH SNPs and WMH wGRS with WMH values in the UK biobank stratified by DBP GRS distribution (quartiles)

**Description:** GW= Genome-wide; Chr = chromosome; SNP = Single Nucleotide Polymorphism; EA = Effect Allele; OA = Other Allele; EAF = Effect Allele Frequency;  $\beta$  = effect estimate; SE = Standard Error; P = P-value; GRS = genetic risk score; wGRS= weighted GRS. Linear regression: adjusted for age, sex, principal components for population stratification, total intracranial volume

**Supplementary Data 11.** Suggestive associations of genetic loci with White Matter Hyperintensity (WMH) volume at  $5 \times 10^{-8} < p < 5 \times 10^{-6}$

**Description:** JMA = Joint Meta-Analysis; EUR= European ancestry; SNP = Single Nucleotide Polymorphism; EA = Effect Allele; OA = Other Allele; EAF = Effect Allele Frequency;  $\beta$  = effect estimate; SE = Standard Error; P = P-value. \* Main effects are assessed in Model 1 adjusted for age, sex, principal components for population stratification, total intracranial volume, and in Model 2 (Model 1 + hypertension)

**Supplementary Data 12.** Loci reaching gene-wide significance (P-value <  $2.77 \times 10^{-6}$ ) from the MAGMA analysis

**Description:** Chr = chromosome; NSNPS = number of SNPs; N = sample size; ZSTAT = Z-value effect size for the gene; P = P-value. \* Association status based on the proximity to the associated White Matter Hyperintensities loci (see online methods)

**Supplementary Data 13.** Association of genome-wide significant White Matter Hyperintensity (WMH) loci with related vascular and neurological traits

**Description:** GW = Genome Wide; SNP = Single Nucleotide Polymorphism; EA = Effect Allele; Chr = chromosome; P = P-value; SBP = Systolic Blood Pressure; PP = Pulse Pressure; DBP = Diastolic Blood Pressure; SMKindex = lifetime smoking index; BMI = Body Mass Index; LDL = Low-Density Lipoprotein; T2D = Type II Diabetes; AS = All Stroke; SVS = Small Vessel Stroke; IS = Ischemic Stroke; CES = Cardio-Embolic stroke; AD = Alzheimer's Disease; ICH = Intracerebral Hemorrhage; VTE = Venous Thrombo Embolism. \* Linkage disequilibrium (LD) between the lead WMH SNP and the overlapping SNP. † Effect estimate corresponding to the WMH risk increasing allele

**Supplementary Data 14.** LD score regression (LDSR) estimates of the genome-wide genetic correlation between White Matter Hyperintensities (WMH) and related vascular and neurological traits

**Description:**  $\beta$  = effect estimate; SE = Standard Error; P = P-value; AS = All Stroke; IS = Ischemic Stroke; DBP = Diastolic Blood Pressure; BMI = Body Mass Index; SBP = Systolic Blood Pressure; SMKindex = lifetime smoking index; SVS = Small Vessel Stroke; GCF = General Cognitive Function; VTE = Venous Thrombo Embolism; T2D = Type II Diabetes; ICH = Intracerebral Hemorrhage; PP = Pulse Pressure; CE = Cardio-Embolic stroke; AD = Alzheimer's Disease; LAS = Large Artery Stroke; LDL = Low-Density Lipoprotein; HDL = High-Density Lipoprotein; TG = triglycerides

**Supplementary Data 15.** Regional genetic overlap between White Matter Hyperintensity (WMH) and related vascular and neurological traits with high probability (> 90%), using a Bayesian pairwise GWAS approach

**Description:** GWAS-PW = GWAS pairwise analysis; pHESS = rho heritability estimator from summary statistics; Chr = Chromosome; PPA3 = posterior probability of association for model 3; ZSTAT = Z-value effect size; P = P-value; AS = All Stroke; BMI = Body Mass Index; CE = Cardio-Embolic stroke; DBP = Diastolic Blood Pressure; GCF = General Cognitive Function; HDL = High-Density Lipoprotein; IS = Ischemic Stroke; LDL = Low-Density Lipoprotein; PP = Pulse Pressure; SBP = Systolic Blood Pressure; SVS = Small Vessel Stroke; SMKindex = lifetime smoking index. \* Nearest gene to the top associated WMH SNP from this region

**Supplementary Data 16.** Association between white matter hyperintensity (WMH) and neurological traits using mendelian randomization (MR) experiments

**Description:**  $\beta$  = effect estimate; SE = standard error; IVW = inverse variance weighted; P = P-value; Q-PHet = heterogeneity P-value from cochrane Q statistic; MR = Mendelian Randomization; QR = Ruckers Q - fitness of model; SVS = Small Vessel Stroke; AS = All Stroke; IS = Ischemic Stroke; AD = Alzheimer's Disease; ICH = Intracerebral Hemorrhage; CE = cardio-embolic

stroke; LAS = large artery stroke; GCF = General Cognitive Function. \* Main effects are assessed in i) Model 1 adjusted for age, sex, the first 4 principal components for population stratification, and total intracranial volume

**Supplementary Data 17.** Association between vascular risk factors and white matter hyperintensity (WMH) using mendelian randomization (MR) experiments

**Description:**  $\beta$  = effect estimate; SE = standard error; IVW = inverse variance weighted; P = P-value; Q-PHet = heterogeneity P-value from Cochran Q statistic; MR = Mendelian Randomization; QR = Ruckers Q - fitness of model; DBP = Diastolic Blood Pressure; HTN = Hypertension; NT = Normotensive; SBP = Systolic Blood Pressure; PP = Pulse Pressure; BMI = Body Mass Index; T2D = Type II Diabetes; LDL = Low-Density lipoprotein; HDL = High-Density Lipoprotein; VTE = Venous Thrombo Embolism; TG = Triglycerides; Hb1Ac = glycated hemoglobin levels; SMKindex = lifetime smoking index. \* Main effects are assessed in i) Model 1 adjusted for age, sex, the first 4 principal components for population stratification, and total intracranial volume; ii) Model 2 (Model 1 + hypertension) ; iii) Model 1 in hypertensive individuals; iv) Model 1 in Normotensive individuals

**Supplementary Data 18.** Association between vascular risk factors (non-pleiotropic BP instruments) and white matter hyperintensity (WMH) using mendelian randomization (MR) experiments

**Description:**  $\beta$  = effect estimate; SE = standard error; IVW = inverse variance weighted; P = P-value; Q-PHet = heterogeneity P-value from Cochran Q statistic; MR = Mendelian Randomization; QR = Ruckers Q - fitness of model; DBP = Diastolic Blood Pressure; HTN = Hypertension; NT = Normotensive; SBP = Systolic Blood Pressure; PP = Pulse Pressure. \* Main effects are assessed in i) Model 1 adjusted for age, sex, the first 4 principal components for population stratification, and total intracranial volume; ii) Model 2 (Model 1 + hypertension) ; iii) Model 1 in hypertensive individuals; iv) Model 1 in Normotensive individuals

**Supplementary Data 19.** Tissue specific enrichment of White Matter Hyperintensity (WMH) risk loci using EPIGWAS and regulatory marks for promoter (H3K4me3) and enhancer (H3K4me1) binding

**Description:** BP = Blood Pressure; P= P-value. \* EPIGWAS association using summary statistics from 25 European-only WMH risk loci. † EPIGWAS association using summary statistics from European-only WMH risk loci that are not shared with any of the blood pressure traits

**Supplementary Data 20.** Tissue specificity from MAGMA gene-property analysis on the tissue specific gene sets (top 10%) using Karolinska mouse brain single cell RNA (scRNA) data

**Description:** WMH = White Matter Hyperintensity; BP = Blood Pressure;  $\beta$  = effect estimate; SE = Standard Error; P = P-value. \* MAGMA association using the full WMH summary statistics from European only main effects analysis. † MAGMA association using the full WMH summary statistics from European only main effects analysis except loci that are harbouring a shared casual variant with any of the blood pressure traits with high posterior probability of association for model 3 (PPA3 > 0.9) from GWAS pairwise analysis

**Supplementary Data 21.** Transcriptome wide association statistics (TWAS) of White Matter Hyperintensity (WMH) with gene expression from related tissue types

**Description:** TWAS = transcriptome Wide Association Study; eGENE = expression associated gene; eQTL = SNP associated with gene expression; TWAS.Z = Z-score effect size for TWAS; TWAS.P = TWAS P-value; COLOC.PP4 = Colocalization posterior probability for model 4; P = P-value; BLD = blood, BRN = brain; HRT = heart; BA = brodmann area; DLPFC = dorsolateral prefrontal cortex; CMC = common mind consortium; NTR = netherlands twin

registry; YFS = young finn's study; ROSMAP = religious order study and the rush memory aging project. \* WMH P-value for the main effects from European-only analysis. † Association status of the eQTLs (PP4  $\geq$  0.75) based on the proximity to the associated White Matter Hyperintensities loci (see online methods)

**Supplementary Data 22.** Drug target enrichment analysis of WMH-TWAS associated genes by Genome for Repositioning drugs (GREP)

**Description:** ICD10 = International Classification of Diseases 10. \* Enrichment for the overall group and the top associated sub-category per group are shown. † Fisher's exact P-value ordered by the significance in the overall group
